1 Which author is which? Gender Authorship Position in Aquaculture Literature

2

3 By: Morgan Chow<sup>1</sup>, Hillary Egna\*<sup>2</sup>, and Jevin West<sup>3</sup>

4 <sup>1</sup>Bay Conservation and Development Commission, and AquaFish Innovation Lab, Corvallis, Oregon, U.S.

5 <sup>2</sup>AquaFish Innovation Lab, Oregon State University, Corvallis, Oregon, U.S.

6 <sup>3</sup>University of Washington, Seattle, Washington, U.S.

7

8

9

10 **ABSTRACT**

11 Examining authorship position in aquaculture facilitates an improved understanding of status of women  
12 in the discipline, as authorship is a critical factor in professional success. In a review of more than eight  
13 million papers in the JSTOR Corpus across disciplines, West et al. 2013 found that men predominate in  
14 the first and last author positions and women are underrepresented in single-authored papers. Other  
15 studies have assessed women authorship, and found that a gender gap in published literature persists.  
16 This study applies the large sample size and methodology of West et al. 2013 to the broad discipline of  
17 aquaculture, and compares these results to gender authorship in the International Aquaculture Curated  
18 Database (IACD) – a compilation of 543 peer-reviewed publications supported by four international  
19 aquaculture programs headquartered at Oregon State University -- and two curated databases in the  
20 JSTOR in the Web of Science.

21 Results reveal that the percentage of women authors (13.8%) was similar for the JSTOR  
22 aquaculture subsample and the IACD (15.7%), yet significantly lower for that of the Web of Science  
23 database (3.7%). Women are not well represented any of the databases, and remain underrepresented  
24 as authors in any position in aquaculture journals. To contextualize our findings, we examined the  
25 number of women graduates in agricultural, biological, natural, and social sciences who earned degrees  
26 in the U.S. from 1991-2015. Results from the U.S. Department of Education's National Center for  
27 Education Statistics and the percent of female graduates in the IACD show that the percent of women  
28 graduates each year has increased with women representing more than 50% of graduates, providing  
29 contextualization for the proportion of women in the discipline. Learning how authorship has changed in  
30 the aquaculture discipline over the recent decades is critical for promoting gender equity for future  
31 aquaculture scholarship and the sustainability of the professional discipline.

32

33

34

35

36

37

38

## 39 INTRODUCTION

40 Studies have found that women are underrepresented in science, publish less (Martin 2012;  
41 Conti and Visentin 2015), and receive less grant funding than their male counterparts (Vernos 2013).  
42 Other studies have assessed women's authorship in disciplines including political science and medicine,  
43 and found that not only does a gender gap in published literature still remain, but women's authorship  
44 has been levelling off in recent years (Breuning and Sanders 2007; Jaggi et al. 2006; and Dubey et al.  
45 2016). From examining authorship of more than eight million papers across disciplines in natural  
46 sciences, social sciences, and humanities, West et al. (2013) found that men dominate in the first and  
47 last authorship positions and that women are underrepresented as single authors. These numbers  
48 matter because authorship position, first and last typically getting the most credit, is a major component  
49 of university evaluations of researcher proficiency. This criterion is applied to determine promotions,  
50 assessments for tenure-track positions, attainment of research funding, and so on. Therefore,  
51 authorship position can be used as a proxy for the status of gender integration and diversity in  
52 academia.

53 The problem with relying too heavily on authorship position for evaluating a researcher's  
54 success is that there is no straightforward process across disciplines for assigning authorship order. The  
55 process of determining each author's contribution to a paper and assigning authorship position varies  
56 across academic institutions, disciplines, and sub-cultures within research groups. This is partly because  
57 it can be difficult to ascertain how much work each contributor has put into a paper (Laurance 2006;  
58 Tschardt et al. 2007). Traditionally, the first author has contributed the most to the paper and  
59 receives the most credit, and the positions of the subsequent authors are determined according to  
60 contribution, alphabetical order, or reverse seniority (Tschardt et al. 2007). The last author often gets  
61 as much credit as the first author, as they are assumed to be the intellectual or financial driving force  
62 (Tschardt et al. 2007).

63           Subtle biases and other factors can influence how authorship is assigned. Increasingly, “gift  
64 authorships” are given, i.e., an author is added for courtesy reasons because of their academic status,  
65 particularly in biomedical journals. This trend further confuses the actual contribution of each author  
66 listed on a publication. Because of the unclear process by which the set of authors for a paper is  
67 determined, identifying the amount of work each author contributed is challenging. The culture of peer-  
68 reviewed publications is also changing and this also affects how changes in gender authorship over time  
69 are assessed. In particular, over the last several decades, the amount of collaborative and cross-  
70 disciplinary research has grown, as has the pressure to publish. Both of these factors have led to growth  
71 in the number of authors listed per paper (Wren et al. 2007). The growing number of authors per paper  
72 makes it even more difficult to adequately and fairly assert authorship order.

73           While studies have revealed gender inequities in authorship in scholarly literature, no such  
74 study has been completed for the aquaculture discipline. The academic discipline of aquaculture is  
75 relatively new and interdisciplinary, and many aquaculture degrees are granted from fisheries  
76 departments. Our analysis of the discipline, therefore, is embedded within the broader domain of  
77 fisheries. In more than 50 academic institutions, a study by Arismendi and Penaluna (2016) found that  
78 women and minorities are still a small portion of tenure-track faculty in the discipline of fisheries. Over  
79 the past three decades, they found only a slight increase in the inclusion of women among the academic  
80 community of fisheries science. This suggests a perpetuation of the “leaky pipeline” in fisheries science  
81 as, in recent years, women have received more than half of the doctoral degrees in the biological  
82 sciences (Miller and Wai 2015; Egna et al. 2012; Blickenstaff 2005). These trends and a study by  
83 Penaluna (2005) reveal that women are less likely to be promoted than men in academia, and the  
84 unlikelihood of a promotion can be linked to the status of gender authorship in peer reviewed literature.  
85 Ignoring these inequities or allowing them to persist limits the development of the scholarly field of  
86 aquaculture. By attempting to conduct a gender authorship analysis for aquaculture, we’re helping to

87 promote the development of the fastest growing food production sector in a relatively new and  
88 interdisciplinary scholarly discipline. A better understanding of gender integration in the discipline is the  
89 first step in understanding how to overcome barriers to the sector's growth.

90 This study evaluates the status of gender authorship in aquaculture by comparing authorships  
91 across the JSTOR Corpus database archive to a subsample of JSTOR and the Web of Science with  
92 aquaculture journals, and to a smaller, curated database, compiled by the Aquafish Innovation lab, of  
93 aquaculture peer-reviewed publications. The International Aquaculture Curated Database (IACD), was  
94 created in order to have a very rich data source of aquaculture publications from around the world that  
95 have been published throughout the entirety of the existence of modern era of aquaculture for scholarly  
96 analysis. The richness of an international curated database lends itself to factoring in additional variables  
97 such as funding and faculty rank, along with other social metrics when assessing authorship. The present  
98 paper shares findings that the percentage of women authors across the aquaculture discipline is  
99 significantly lower than women's apparent presence in the discipline. Since women have received more  
100 than half of the doctoral degrees in the biological sciences, it is plausible that women represent more  
101 than 16% of researchers working in the discipline, while this is the rate at which women are authoring  
102 papers. This number is corroborated across two completely disparate, yet valuable sources within the  
103 discipline.

#### 104 **MATERIALS AND METHODS**

105 In order to build on the work of West et al. (2013) and other similar studies conducted on  
106 gender authorship in peer-reviewed literature for the aquaculture discipline, we compared multiple data  
107 sets. The first and richest dataset, the International Aquaculture Curated Database (IACD), was built by  
108 the AquaFish Innovation Lab, and consists of 543 articles written by 1706 authors in 121 journals, all of  
109 which were published between 1983-2016. The IACD draws from peer-reviewed papers whose research  
110 was supported by four separate international aquaculture programs, which were developed by Hillary

111 Eгна including: (1) Pond Dynamics/Aquaculture Collaborative Research Special Program (CRSP) (1982-  
112 1996); (2) Aquaculture CRSP (1996-2008); (3) AquaFish CRSP (2006-2013); and (4) AquaFish Innovation  
113 Lab (2013-Present). AquaFish Innovation Lab staff reviewed both electronic and hard copies of journal  
114 articles, including full names, gender of authors, and author position, with the percentage of unknowns  
115 being less than 1%. The gender of the authors was recorded by Eгна from having a personal connection  
116 to the author or by the lead authors themselves.

117         The IACD was analyzed for comparison to three other datasets: two separate JSTOR collections  
118 (The Recalibrated JSTOR and the JSTOR Subsample) and a Web of Science dataset. JSTOR is an  
119 expansive database of publications organized according to broad topics, and contains publications  
120 dating back to 1665, and was used for the West et al. (2013) authorship study. Web of Science is a  
121 similar online database, as well as Academic Search Premier, Scopus, and Microsoft Academic Graph  
122 (MAG). Each database has proprietary strengths and weaknesses. JSTOR has far more time depth than  
123 any of the other databases and it has full text for all their articles whereas most of the others have only  
124 bibliographic data. Web of Science has decades of data. Hundreds of databases have been created, but  
125 many of them are specific to certain disciplines or types of publications, whereas those listed above are  
126 more comprehensive across the literature. By comparing the IACD to both JSTOR and the Web of  
127 Science, more journals within the interdisciplinary discipline of aquaculture are captured in this analysis.  
128 JSTOR Re-calibration was done in order to revisit the gender findings from West et al. (2013) and  
129 compare the findings to authorship data in the present study. The JSTOR aquaculture subsample  
130 separated the aquaculture journals from others within the broad database. It begins in 1913 as that was  
131 the year one of the first aquaculture-related journals began. JSTOR journal areas include: cultural  
132 studies, arts, business and economics, history, humanities, law, medicine and health, science and  
133 mathematics, and the social sciences. Aquaculture journals are located within the science and  
134 mathematics category. Web of Science is an online subscription-based scientific citation indexing service

135 produced by the Institute for Scientific Information and includes science, social science, arts, and  
136 humanities disciplines. From the more than 90 million records, we extracted articles from more than  
137 100 journals within the aquaculture discipline. This includes all of the journals in the IACD plus more that  
138 are commonly publish research in aquaculture.

139 In the JSTOR and Web of Science, authorships are defined as an author-paper relationship, and  
140 does not count unique authors. This requires author disambiguation for the full databases, which is an  
141 ongoing challenge in the field of bibliometrics and scientometrics. Because of the large number of  
142 authorships in JSTOR and Web of Science, gender was inferred by looking up the frequency of first names  
143 in the U.S. Social Security Database. For example, if “James” appears 99% of the time as a boy, we assume  
144 that an author with the name “James” is male. For androgynous names such as “Andrea” and first names  
145 written as initials, we could not infer gender so we do not include these authors in the analysis. Therefore,  
146 the gender labels are self-identified and determined by only looking at the names and the frequency of  
147 gender for a given name. Unidentifiable names account for about 1 in every 5 authors in the Recalibrated  
148 JSTOR dataset ( Table 1).

149 The Recalibrated JSTOR Corpus and Web of Science cover all major realms of scientific  
150 publications; the aquaculture subsample of the JSTOR Corpus and the Web of Science include a large  
151 number of articles from a select few aquaculture journals; and the IACD is a substantiated aquaculture-  
152 specific database containing fewer journal articles. The IACD, JSTOR, and Web of Science comprise  
153 journals in the biotechnical domain of aquaculture more so than in the social or management domains  
154 of the discipline. Together, the four data sources allow for a stronger understanding of gender  
155 representation in journal authorship.

156 Lastly, we contextualized the findings from these datasets within the percentage of women  
157 graduating in aquaculture, as well as factored in how the field has grown over time. As aquaculture



158 degrees were not conferred widely or until recently in academia, assumptions were made to cover the  
159 wide range of academic disciplines that could relate to aquaculture.

| <b>Dataset</b>       | <b>#Journals</b> | <b>#Articles</b> | <b>#Authorship</b> | <b>Time<br/>Period</b> | <b>% Genders<br/>Unknown</b> |
|----------------------|------------------|------------------|--------------------|------------------------|------------------------------|
| JSTOR                | 2227             | 1.8 million      | 2.8 million        | 1666-2011              | 26.7%                        |
| JSTOR Sub-<br>sample | 8                | 23,381           | 43,146             | 1913-2016              | 23.7%                        |
| IACD                 | 121              | 543              | 1706               | 1983-2016              | <1%                          |
| Web of<br>Science    | 185              | 494,531          | 496,745            | 1980-2016              | 69%                          |

160

161 **Table 1.** Four datasets used for this study with varying journals, articles, authorships, time periods, and  
162 percent of genders unknown.

163 **Figure 1.** Flow chart of methodology used for this study.

164

165

166 **RESULTS**

| <b>Authorship Position of women</b> | <b>International Aquaculture Curated Database (IACD)</b> | <b>JSTOR – Aquaculture subsample</b> | <b>JSTOR Corpus</b>                              | <b>Web of Science</b> |
|-------------------------------------|----------------------------------------------------------|--------------------------------------|--------------------------------------------------|-----------------------|
| Any position                        | 15.7%                                                    | 13.8%                                | 16.1%                                            | 8.5%                  |
| Single Author                       | ≥1990: 11.1%                                             | 11.0% (All years)                    | All years: 17.0%<br><1990: 12.0%<br>≥1990: 26.0% | 17.7%                 |
| First Author                        | 14.2%                                                    | 15.8%                                | 19.2%                                            | 5.1%                  |
| Last Author                         | 14.0%                                                    | 16.5%                                | 19.6%                                            | 3.6%                  |

167 **Table 2.** Findings by significant authorship position across the four datasets.

168 In the entire JSTOR Corpus, comprising nearly 2 million papers, women represent 21.9% of total  
 169 authorships for papers published between 1665-2011 (West et al. 2013). This timeframe represents the  
 170 existence of JSTOR publications. For comparison, in fisheries-related fields such as Ichthyology and  
 171 Aquatic Ecology, women represent 21.0% and 9.0% of total authors, respectively. In the JSTOR  
 172 aquaculture subsample, 23,381 articles and 43,146 authorships within eight aquaculture journals (since  
 173 1913) were extracted and assessed for authorship gender in multiple positions to compare to the  
 174 Recalibrated JSTOR dataset. The JSTOR recalibration adjusted for the period in which the first  
 175 aquaculture journal in our subsample was initiated. The following eight journals were selected because  
 176 they are highly ranked in the aquaculture discipline: *Ambio*, *Copeia*, *Estuaries and Coasts*, *Journal of*  
 177 *Coastal Conservation*, *Journal of the North American Benthological Society*, *Limnology* and  
 178 *Oceanography*, and *Water and Environment Research*. We recognize that these journals do not

179 comprise a representative sample of all aquaculture journals, and are skewed towards biotechnical  
180 domains of aquaculture. However, these journals are consistent with the journals available in JSTOR. In  
181 the Web of Science, comprising almost 500,000 articles in the subsample extracted for this study,  
182 women represent 8.5% of the total authorships for papers published between 1980-2016. This  
183 timeframe is in line with the IACD for comparison. This analysis includes articles from 185 journals that  
184 are considered relevant to the aquaculture discipline.

185 Table 2 outlines our findings by significant authorship position across the four main datasets of  
186 peer-reviewed aquaculture literature. Across the board, women represent between 9-15% of significant  
187 authorship positions in these four datasets. Due to the methodology of assigning genders to author  
188 names within the JSTOR alongside the U.S. Social Security Database, there are higher percentages of  
189 unknown genders for the JSTOR and Web of Science datasets than for the IACD. Results show that  
190 women occur in low percentages as authors in any position in aquaculture journals, reinforcing results  
191 found by West et al. (2013) more generally in science. Women represent 16.1% of authorship in all  
192 positions in the Recalibrated JSTOR Corpus and only 8.5% in the Web of Science, after correcting for  
193 unknowns. The percentage of women authors was comparable for the JSTOR aquaculture subsample  
194 (13.8%) and the journals in the IACD (15.7%), but much less so for the Web of Science (Table 2). For  
195 single-authored papers, the JSTOR Corpus shows an overall decline over time. However, there has been  
196 an increase in sole authorship by women. Before 1990, only 12% of single authored papers were written  
197 by women. After 1990, that number increased to 26%. In the JSTOR aquaculture subsample, women  
198 represent 11.0% of single-authored papers since 1913, and 17.7% in the Web of Science, respectively. In  
199 the IACD, women represent 11.1% of all single authored papers since 1990.

200 Percentages of women in last authorship positions were comparable for the publications in the  
201 JSTOR Aquaculture subsample and the IACD at 15.8% and 14.4%, but were much less for the Web of  
202 Science at 3.6%. A similar trend is seen with first authorship positions where the JSTOR Aquaculture

203 subsample are comparable at 15.8% and 14.2%, while the Web of Science is only a mere 5.1%. First and  
204 last author results from the overall JSTOR Corpus for all fields were slightly higher than for the field of  
205 aquaculture at 19.2% for first authorship and 19.6% for last.

206 As well as recent changes in the publication process for peer-reviewed literature, the history of  
207 aquaculture was considered for this analysis. To understand the evolution of gender in the aquaculture  
208 discipline, it is important to first recognize that the discipline of aquaculture has changed substantially  
209 over the past 30 years (FAO 2016). Global aquaculture production took off in the early 1980s, and rapidly  
210 expanded through the 1990s to present to accommodate a growing global population with its changing  
211 diets and preferences. Development was especially expansive in the 1980s, with pond culture  
212 predominating total aquaculture production. The fisheries discipline has also grown in both scope and  
213 geographic range. There has been a global scale expansion of marine fisheries from the North Atlantic and  
214 West Pacific to the Southern Hemisphere. The southward expansion of intense industrial fisheries  
215 exploitation occurred at a rate of almost one degree latitude per year with the greatest expansion  
216 occurring in the mid-1980s and early 1990s (Swartz et al 2010).

217 Growth of the aquaculture discipline and industry have, not surprisingly, mirrored each other.  
218 Preliminary data from over 300 aquaculture-related publications shows the rapid inception of new  
219 journals from the late 1980s to the 2000s. Overall, the number of journals and publications has grown in  
220 all disciplines. In the Recalibrated JSTOR set, we find that roughly half of all peer-reviewed publications  
221 were published after 1990. We think that this is consistent across other large scholarly article corpora.  
222 Scientific publishing, like many other industries, has faced many changes with the onset of the internet.  
223 Journal articles today are accessed online with increasing frequency, and retrieved in digital formats  
224 rather than through printed sources (Laakso et al. 2011). The way that journal articles are accessed online  
225 has also changed in recent years, particularly with the growth of Open Access publishing between 1993-  
226 2009. Since 2000, the annual growth rate for Open Access journals has been 18%, and 30% for the total

227 number of published articles (Laakso et al 2011). The evolving mechanisms for publishing peer-reviewed  
228 literature have consequences for researchers in the field, and their authorship track records.

229 Figure 2 shows the years that major aquaculture journals began (n=166). There was significant growth in  
230 aquaculture journals in the early 1970s through the 1990s. For example, JWAS began in 1970. While this  
231 is not a comprehensive list of all of the journals that ever publish aquaculture articles, it represents most  
232 of the major journals in the discipline that had initiation years available online. Figure 2 follows a similar  
233 curve to that of the global aquaculture production, which started to increase in the early 1980s, and  
234 began rapidly expanding in the 1990s to the present to accommodate a growing global population. The  
235 discipline has growth both in scope as well as geographic range.

236 **Figure 2.** History of aquaculture and journal initiation over time.

237 **Figure 3.** Women authorship by position over time in IACD.

238 Figure 3 shows the percent of each position in the IACD for each year between 1990-2016. Men first and  
239 last authorships dominate the journal articles published each year, with women single authors being the  
240 lowest. However, the gap between men and women authors does seem to decrease over time, which  
241 leads us to believe that women's status in the field is improving.

242 **Figure 4.** Percent women graduates in Agricultural, Biological, Natural and Social Science. Source: U.S.  
243 Department of Education, National Center for Education Statistics.

244 To contextualize our findings with the percentage of women graduating in the field, we  
245 examined several sources to better understand the numbers of women graduates in aquaculture.  
246 Because of the relatively nascent, and interdisciplinary nature of aquaculture, we applied sources from  
247 within the U.S. and international as well as across disciplines including fisheries, biological, agricultural,  
248 and social sciences. According to Elsevier, approximately 28% of researchers around the globe are  
249 women, yet only 13% of highly cited authors in 2014 were women (Elsevier 2015). In the U.S., we used  
250 the U.S. Department of Education's National Center for Education Statistics to quantify the number of

251 female graduates in agricultural, biological, natural, and social sciences who earned Bachelor's Master's  
252 and PhD's in the U.S. from 1991-2015. Figure 4 shows the percent of female graduates each year at each  
253 degree level. The proportion of women graduating in the field has increased over time, with the most  
254 obvious increase being that of PhD graduates, representing roughly 30% of graduates in 1991 to more  
255 than 50% of graduates in 2015. Additionally, Arismendi and Penaluna's 2016 study on women  
256 publishing in fisheries, found that women and minorities are still a small portion of tenure-track faculty  
257 in the discipline of fisheries. Lastly, we evaluated the percent of women AquaFish graduates per year,  
258 and found a slight increase over time, with no significant upward trend.

259 This analysis is very useful as many students publish their research chapters soon after they  
260 graduate, despite whether or not they continue to work in academia and publish. While these  
261 graduates do not represent all of the women science graduates internationally, since the data is U.S.-  
262 based, it is a still a useful comparison for a general understanding of how many women are graduating  
263 in the agricultural, biological, natural, and social sciences, all of which feed into aquaculture scholarly  
264 literature.

265 **Figure 5.** AquaFish graduates as percent women by year.

266 **Figure 6.** Percent women graduates in science alongside percent first and last authorship positions in  
267 the IACD and Web of Science datasets.

268 Since the IACD percentages reflect that of the JSTOR sub-sample and Corpus, it is a proxy for the  
269 women authors in the discipline as compared to women graduates in science in the U.S. Figure 4 shows  
270 percent women graduates with Master's and PhD's in agricultural, biological, natural, and social sciences  
271 from 1991-2015, in black, alongside the percent of significant authorship positions women held each  
272 year for the IACD. These numbers are from the U.S. Department of Education's National Center for  
273 Education Statistics. There is a slight increase in women authorship positions as a percentage of the  
274 total publications for each year, over time.

275 **DISCUSSION**

276           It appears that the gap in women authorship is closing, however women authorship remains low  
277 considering the increasing proportion of women graduates in aquaculture sciences. However, the U.S.  
278 data does not represent the proportion of women that are actively publishing in aquaculture as an  
279 academic discipline. Moving forward, it is important to encourage organizations and individuals to  
280 consider how structures that propagate gender bias can be overturned to promote better outcomes in  
281 authorship, hiring, and promotions.

282           These findings can be applied to the greater context of women in academia. In 2015, Elsevier  
283 published a study of research performance through a gender lens across 20 years, 12 geographies, and  
284 27 subject areas to share insights and guidance on gender research and equity policy with governments,  
285 funders, and institutions worldwide. They found that approximately 28% of researchers around the  
286 globe are women, with only 13% of highly cited authors in 2014 were women. However, there is a drop  
287 off in degrees, starting at the PhD level. Further, health and life science have the highest representation  
288 of women among researchers. Studies like Elsevier's are continuing to explore why the leaky pipeline  
289 occurs, and why women are dropping out of academia in their PhD.

290           Given this study and others, we recommend a number of steps to combat gender inequity in  
291 aquaculture scholarly literature and other academic disciplines. First, it is important to continue to track  
292 authorship to measures success or weaknesses in progress towards integration. Standardized practices  
293 for assigning authorship position would be mainstreamed and made transparent. Faculty and mentors  
294 should encourage women scientists to remain in academia through mentoring, opportunities for  
295 promotion, and opportunities to review and edit other publications. While we do not yet have details on  
296 non-unique identifiers for prolific authors and people with multiple degrees, this could be an important  
297 next step to better understanding trends in authorship position by gender.

298 **CONCLUSION**

299 Comparing the percentage of women authors across all four databases reveals a low percentage  
300 of women authors -- between 8.5% --16.1% of all authorships. The four data sets represent a wide range  
301 of aquaculture journals that are well regarded within the discipline. These results for aquaculture echo  
302 the findings of West et al. (2013) for women in many fields of science, as well as (Arismendi and  
303 Penaluna 2016) on the status of women publishing in the broader discipline of fisheries.

304 While there are many factors that may explain why women hold a low percentage of  
305 authorships across all fields of peer-reviewed literature and in aquaculture, in particular, these results  
306 do not reveal the cause. The data reflect an end-result that is influenced by a number of factors that are  
307 not easily studied and have not yet been addressed in the project. One of the main factors is the  
308 proportion of women trained and actively working in the aquaculture discipline. Also, recognizing that  
309 gender is a social construction, our preliminary work was simplified by binary designations (man-  
310 woman; male-female); additional deeper analyses may reveal nuances for other underrepresented  
311 groups.

312 Since it is known that women have been reported by the World Bank (2008) to comprise 47% of  
313 the total workforce in fisheries, this is a rough estimate confounded by a paucity of gender-  
314 disaggregated data in aquaculture and fisheries overall. Few data are available on the percentage of  
315 women in the fisheries discipline. One exception is the study by Arismendi and Penaluna (2016) for the  
316 United States of America. In that study, 26% of federal fisheries scientists and managers, and 31% of  
317 research faculty were women. Until adequate numbers for women in aquaculture and in the  
318 aquaculture discipline are obtained, it is useful to apply information from the greater field of fisheries to  
319 frame the research.

320 These results suggest that gender inequities in aquaculture, specifically in authorship of peer-  
321 reviewed literature, exist. While these are general conclusions, 15% is a relatively low number for  
322 women authorships in aquaculture considering that the proportion of women authorships in the entire



323 JSTOR corpus is 22%. The IACD may prove a useful tool for social network analyses including  
324 assessments of unique very highly networked authors, and of subsequent generations of authorships.  
325 The richness of an international curated database lends itself to factoring in variables such as funding  
326 and faculty rank, along with other social metrics. The information in these data sets can be used by  
327 other studies to assess the major influences on gender equity in the field of aquaculture. Increasing  
328 awareness of the equitable treatment of scientists in aquaculture remains essential for the sustainable  
329 growth of the discipline.

## 330 **Acknowledgements**

331

332 All listed authors contributed a significant amount to the paper. Dr. Hillary Egna had the original  
333 intellectual contribution to the work and a strong vision for the paper. She also contributed to data  
334 collection, analysis, writing and editing. Morgan Chow collected the IACD information, analyzed results  
335 with the JSTOR databases, and wrote the backbone of the paper. Dr. Jevin West conducted data analysis  
336 for the recalibrated and subsample of JSTOR, while providing substantial information for the methods.  
337 AquaFish Innovation Lab intern, Katie Nye Hogen assisted with IACD data collection and compilation. This  
338 research is a component of the AquaFish Innovation Lab, which is supported in part by the US Agency for  
339 International Development (USAID CA/LWA No. EPP-A-00-06-0012-00), and in part by participating  
340 institutions. The AquaFish accession number is 1464. The opinions expressed herein are those of the  
341 authors and do not necessarily reflect the views of the AquaFish Innovation Lab or USAID.

## 342 **References**

- 343 Arismendi I, Penaluna BE. Examining Diversity Inequities in Fisheries Science: A Call to Action.  
344 *BioScience*. 2016; 6: 7: 584-591. Available from: <https://doi.org/10.1093/biosci/biw041>
- 345 Blickenstaff JC. Women and science careers: leaky pipeline or gender filter? *Gender and Education*.  
346 2005' 17: 369-386.
- 347 Breuning M, Sanders K. Gender and journal authorship in eight prestigious political science journals. *PS*:

- 348 Political Science & Politics. 2007; 2: 357-351.
- 349 Conti A, Visentin F. Science and Engineering Ph.D. Students' Career Outcomes by Gender. PLoS ONE  
350 2015; 10: 8. e0133177. doi: 10.1371/ journal.pone.0133177.
- 351 Dubey D, Sawhney A, Atluru A, Amritphale A, Dubey A, Trivedi J. Trends in authorship based on gender  
352 and nationality in published neuroscience literature. Neurology India. 2016; 64: 1: 97-100.
- 353 Eгна E, Reifke L, Gitonga N. Improving Gender Equity in Aquaculture Education and Training: 30 Years of  
354 Experiences in the Pond Dynamics/Aquaculture, Aquaculture, and AquaFish Collaborative  
355 Research Support Program. Asian Fisheries Science Special Issue. 2012; 255: 119-128.
- 356 Food and Agriculture Organization (FAO) of the United Nations; 2016. Global Aquaculture Production.  
357 Fishery Statistical Collections [Internet] Available from:  
358 <http://www.fao.org/fishery/statistics/global-aquaculture-production/en>
- 359 Jagsi R, Phil D, Guancial EA, Worobey CC, Henault LE, Chang Y, Starr R, Tarbell NJ, Hylek EM. The "gender  
360 gap" in authorship of academic medical literature -- a 35-year perspective. The New England  
361 Journal of Medicine. 2006; 355: 281-287.
- 362 Laakso MP, Welling H, Bukvova L, Nyman B, Hedlund BT. The Development of Open Access Journal  
363 Publishing from 1993-2009. PLoS ONE 2011; 6: 6. Available from:  
364 <https://doi.org/10.1371/journal.pone.0020961>
- 365 Laurance W. Second thoughts on who goes where in author lists. Nature. 2006; 442: 26.
- 366 Martin LJ. Where are the women in ecology? Frontiers in Ecology and the Environment 2012; 10: 177–  
367 178.
- 368 Perna LW. Sex differences in faculty tenure and promotion: The contribution of family ties. Research in  
369 Higher Education. 2005; 46: 277–307.
- 370 Swartz WE, Sala S, Tracey R, Watson. Pauly D. The Spatial Expansion and Ecological Footprint of Fisheries  
371 (1950 to Present PLoS ONE. 2010; 5: 12. Available from:  
372 <https://doi.org/10.1371/journal.pone.0015143>
- 373 Tschardt T, Hochberg ME, Rand TA, Resh VH, Krauss J. Author Sequence and Credit for Contributions  
374 in Multiauthored Publications. PLoS Biol. 2007; 5: 1. DOI:10.1371/journal.pbio.0050018.
- 375 Vernos I. Quotas are questionable. Nature 2013; 495: 39.
- 376 West JD, Jacquet J, King MM, Cornell SJ, Bergstrom CT. The Role of Gender in Scholarly Authorship. PLoS  
377 ONE 2013; 8: 7. Available from: <https://doi.org/10.1371/journal.pone.0066212>
- 378 World Bank. 2008. Small-Scale Capture Fisheries: A Global Overview with Emphasis on Developing  
379 Countries. PROFISH Series, Washington, D.C.
- 380 Wren JD, Kozak KZ, Johnson KR, Deakyne SJ, Schilling LM, Dellavalle RP. The write position. EMBO  
381 Reports. 2007; 8: 988-991.
- 382

# COURT APPROACH

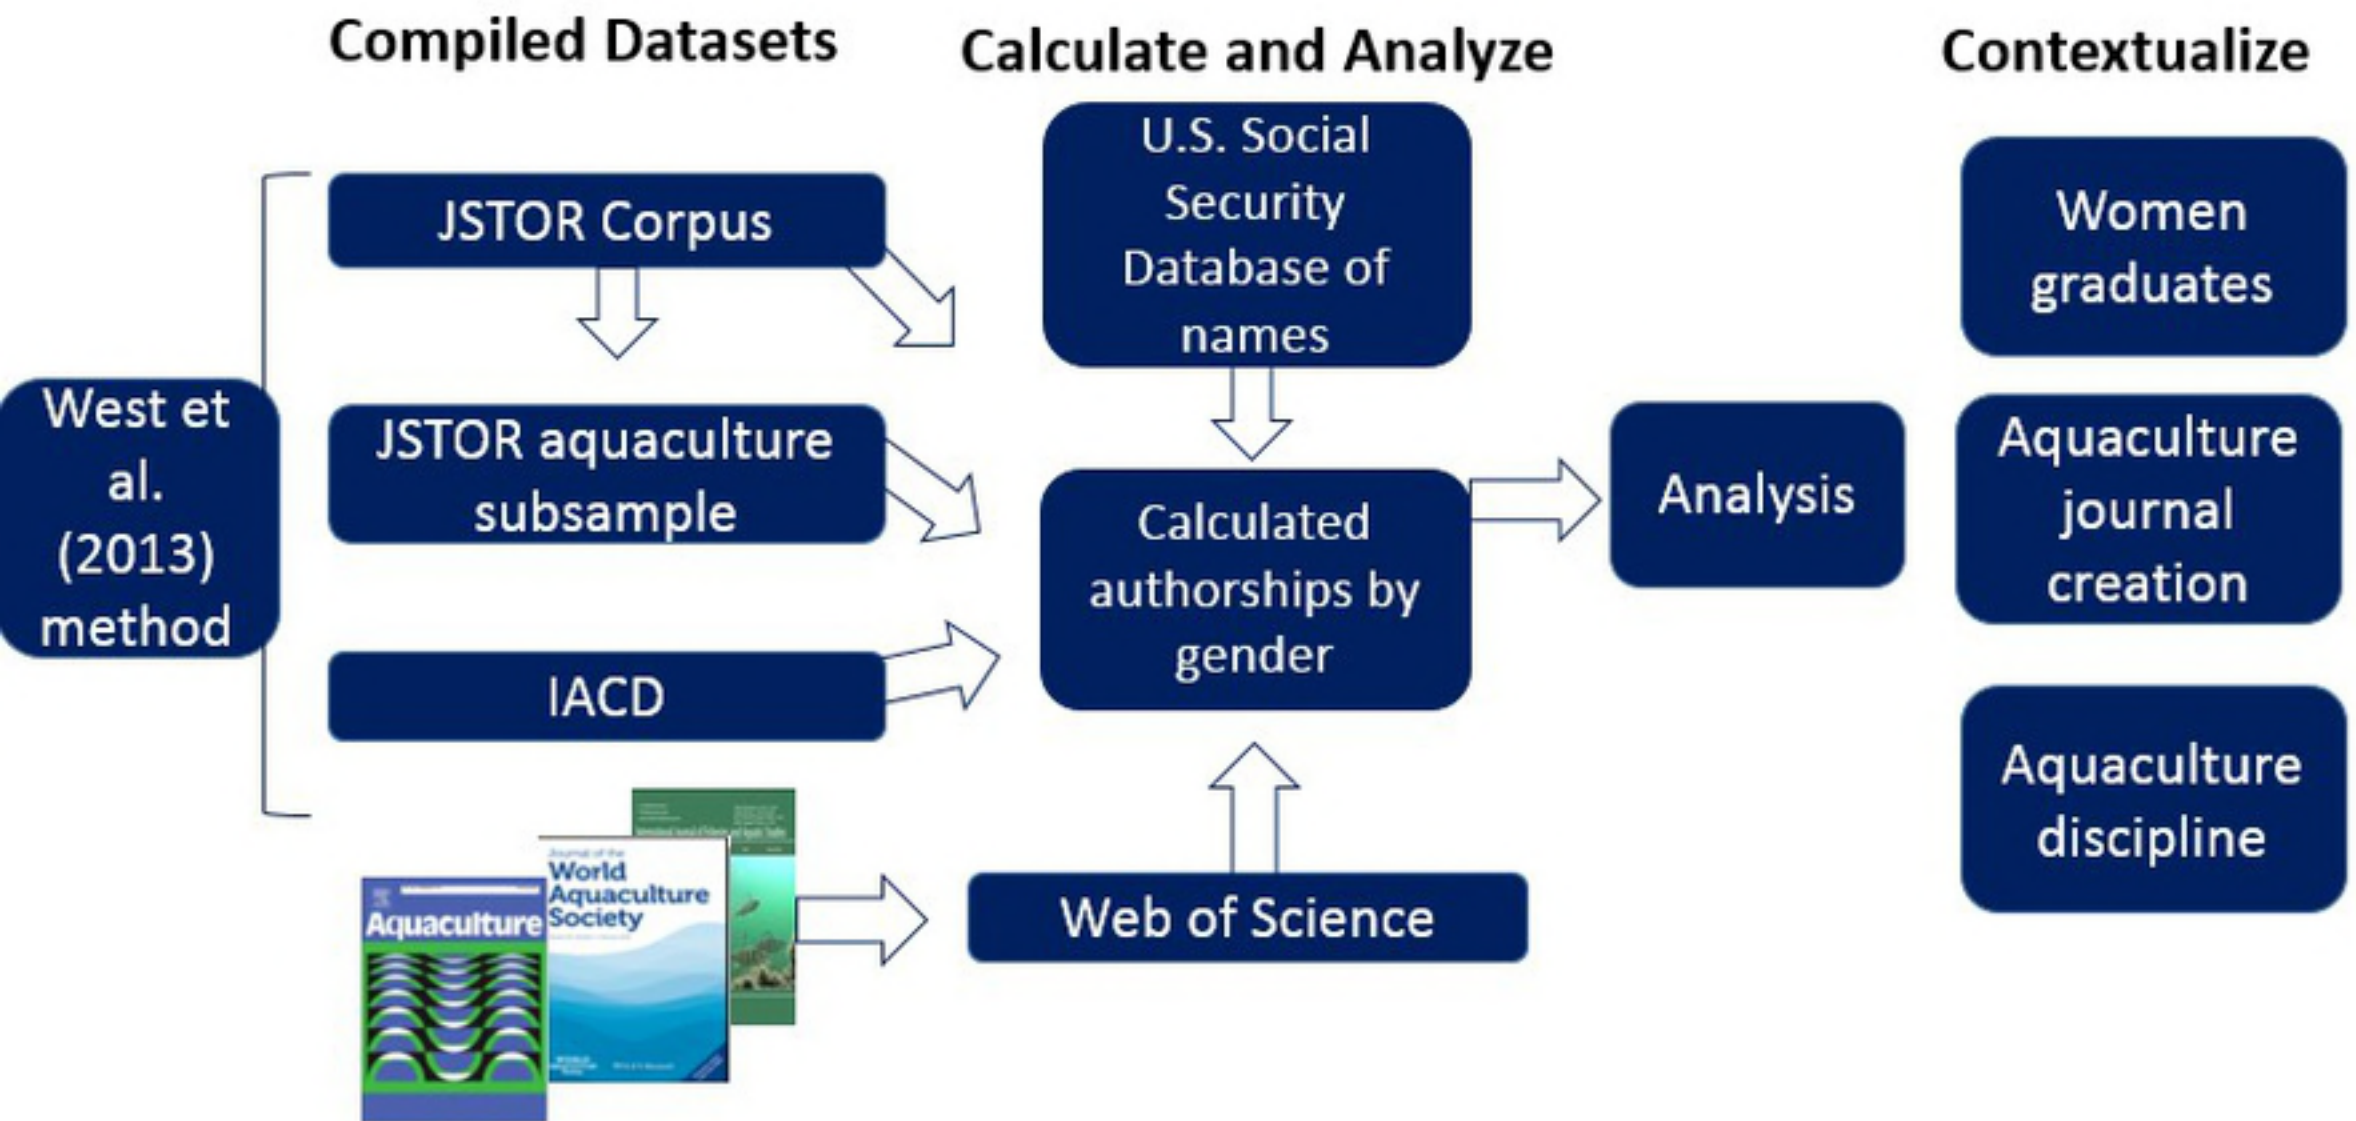

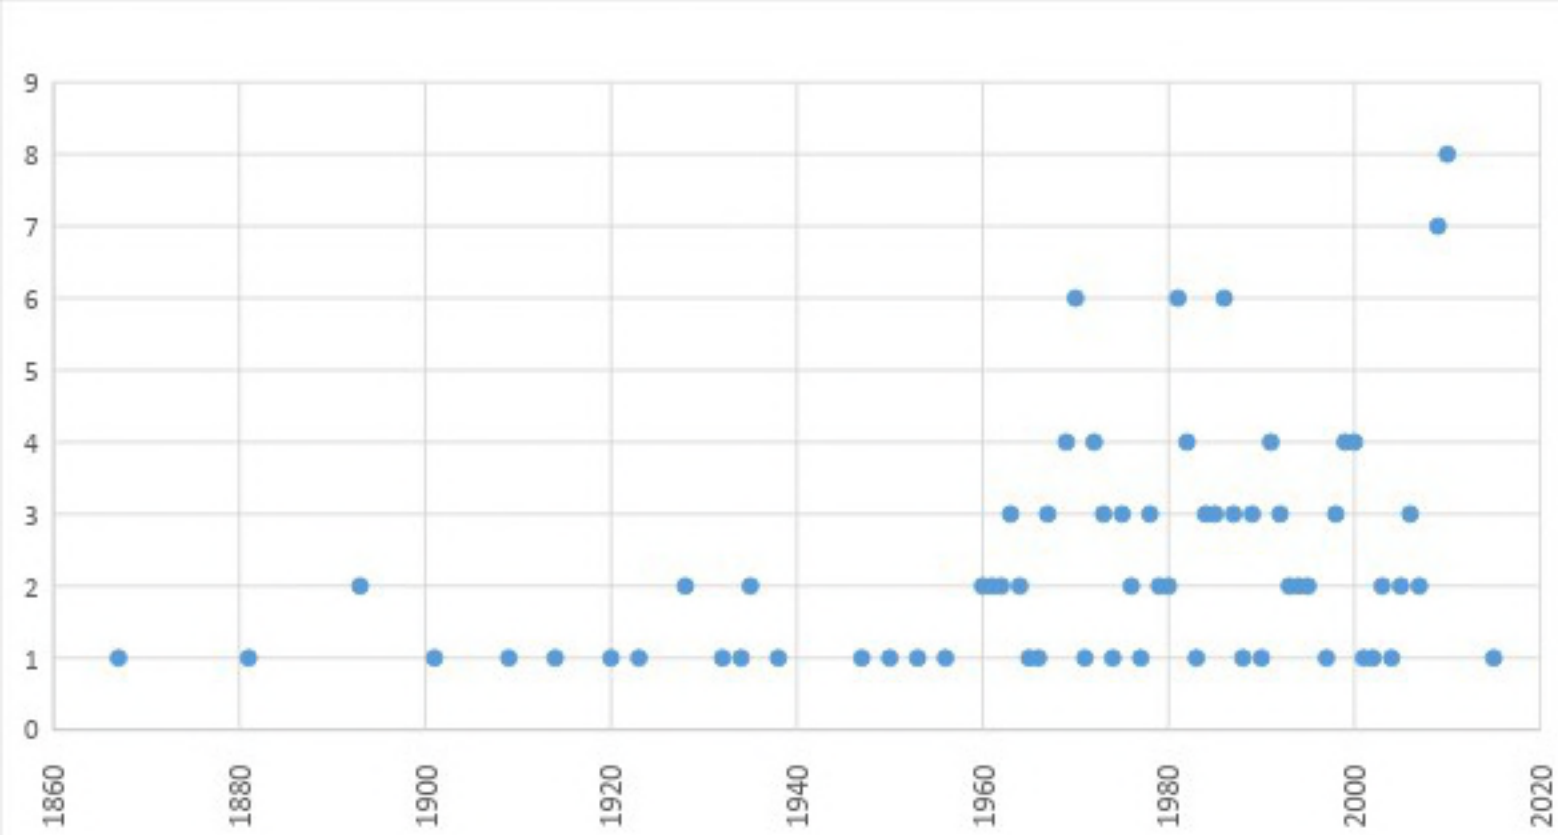

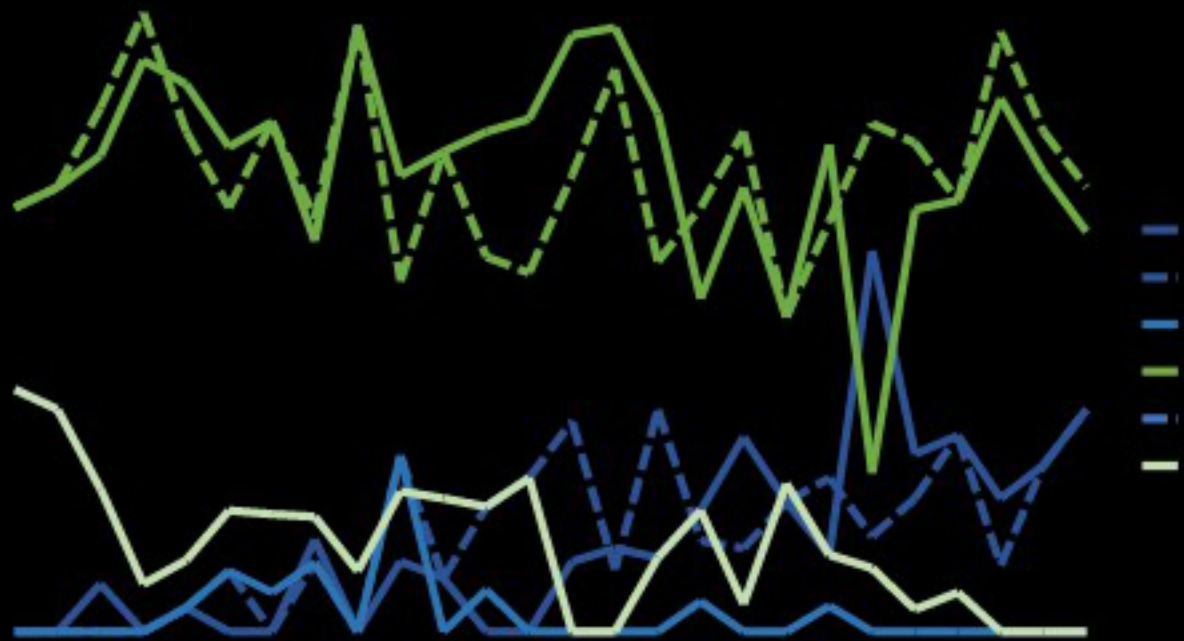

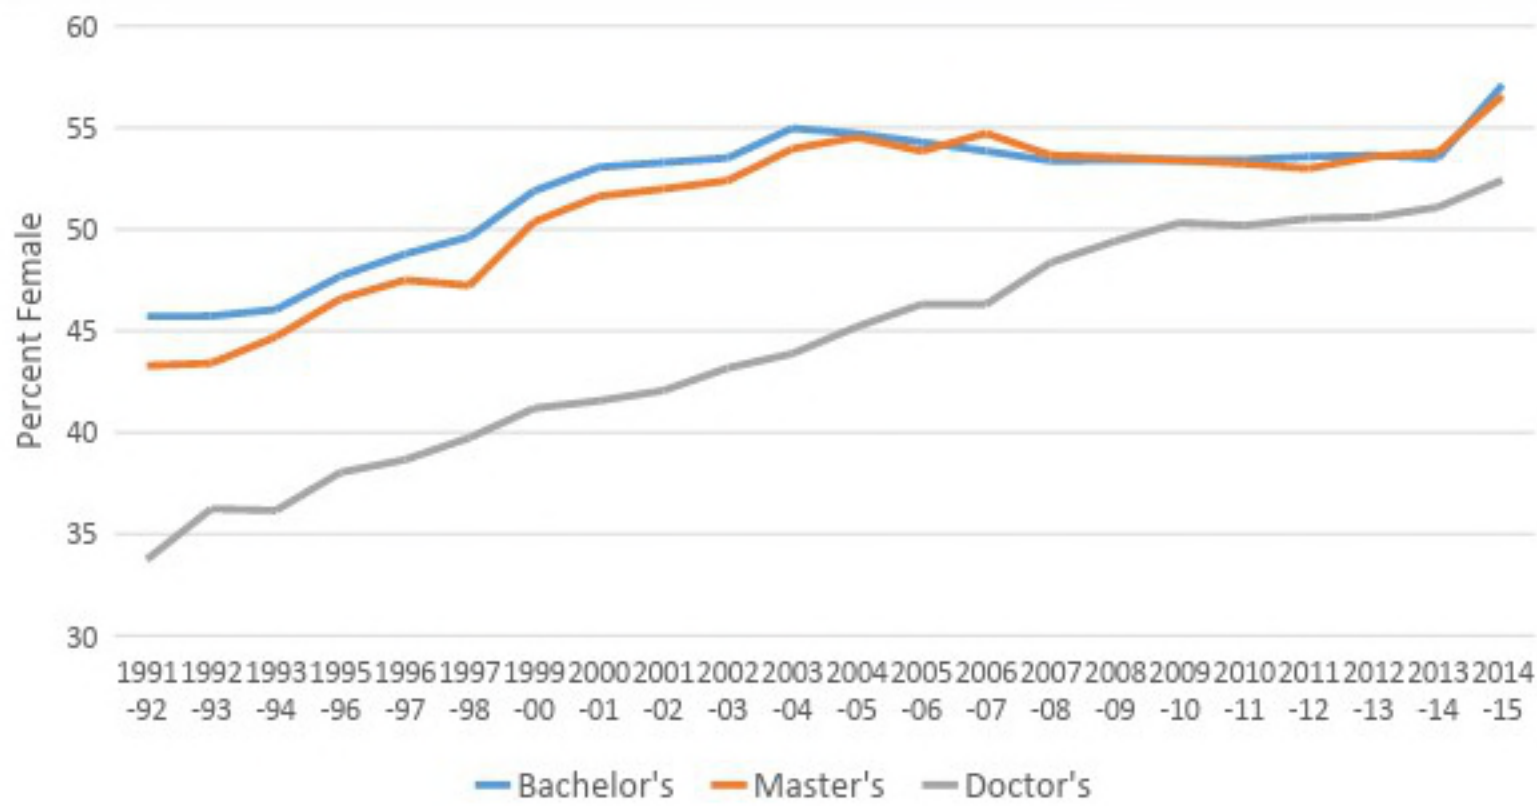

# AquaFish Students, % Women by Year

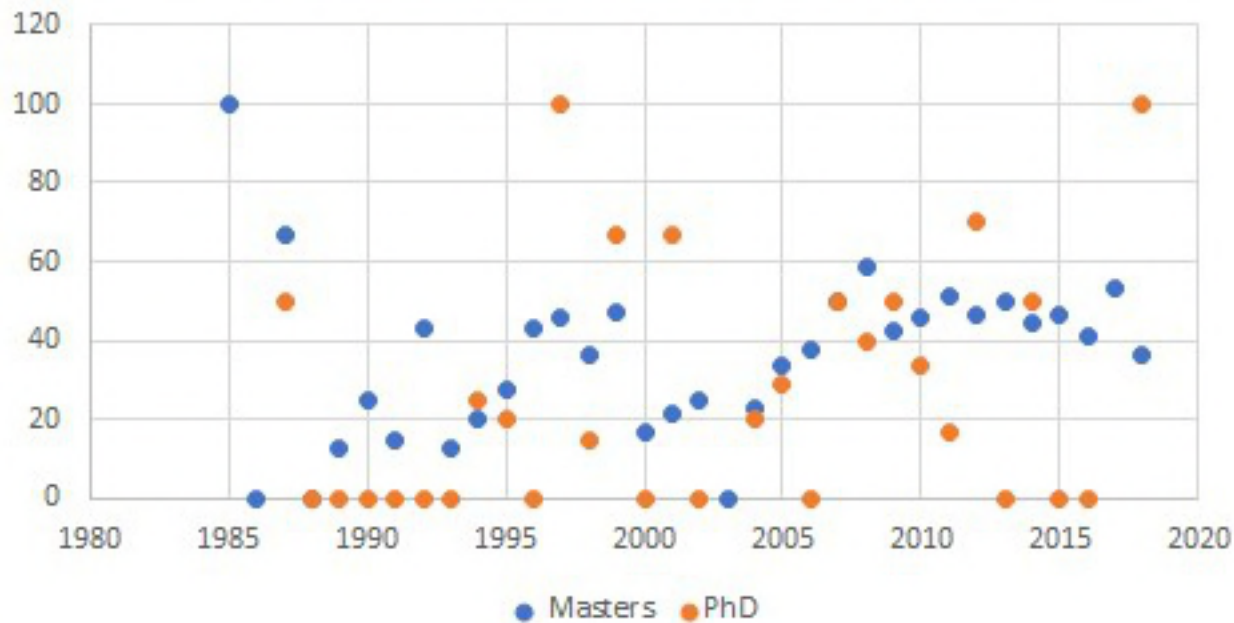

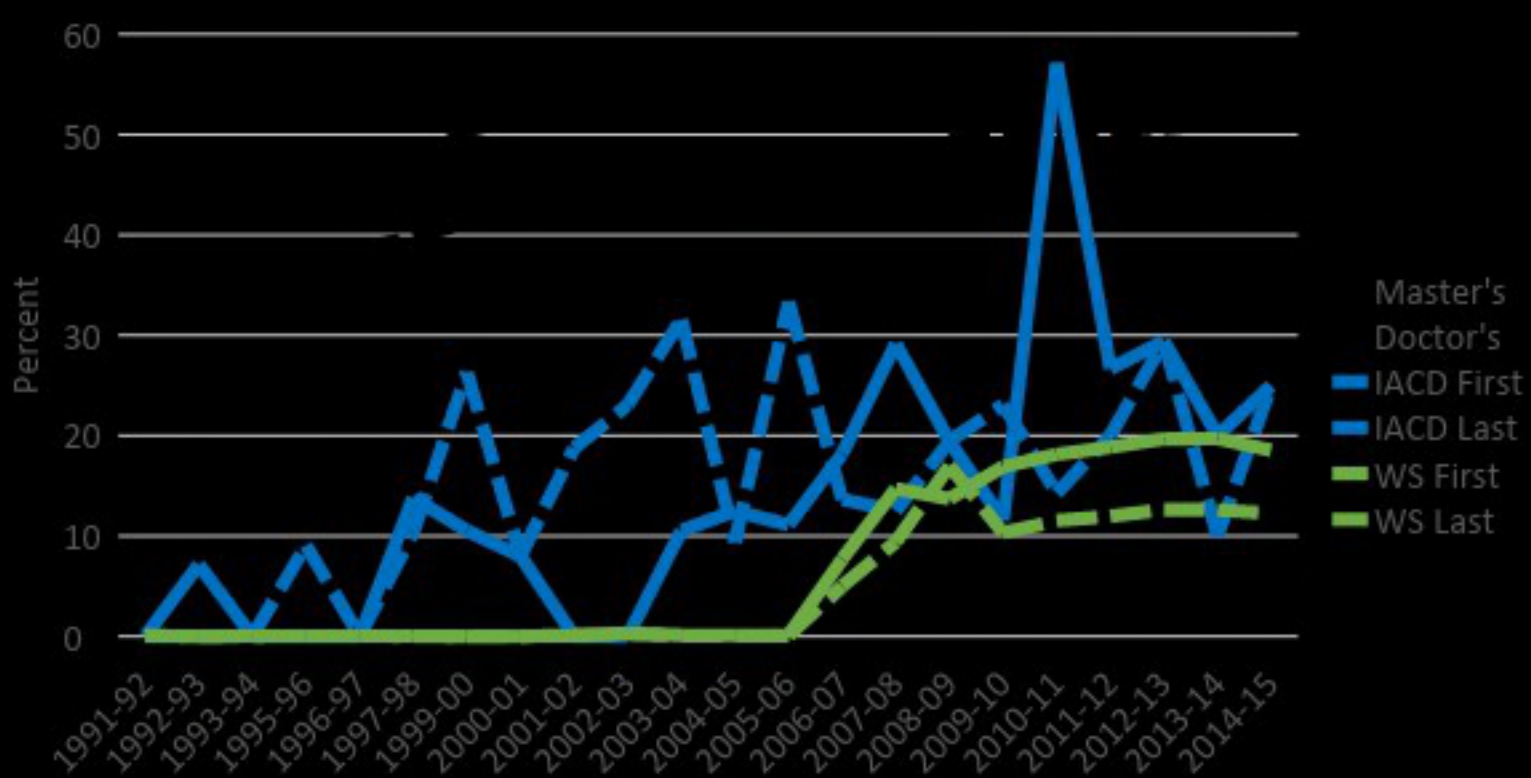

Source: https://www.biorxiv.org/content/10.1101/486209v1.full.pdf
